# Supplementary material for: Lower dietary folate intake increases the risk of autoimmune thyroiditis
Source: Front Nutr. 2025 Jun 19;12:1595825. doi: 10.3389/fnut.2025.1595825 (PMC12221903; doi:10.3389/fnut.2025.1595825)
Supplement: Supplementary file 1 [file Table_1.xlsx]

## Sheet: Sheet1
Table S1 Variables and Abbreviations
Variable	Abbreviation
Age	-
Gender	-
Race	-
Height	-
Weight	-
Body Mass Index	BMI
White Blood Cell Count	WBC
Red Blood Cell Count	RBC
Segmented Neutrophils Number	NE
Lymphocyte Number	LYM
Monocyte Number	MO
Eosinophils Number	EO
Platelet Count	PLT
Red Blood Cell Distribution Width	RDW
Hemoglobin	HGB
Albumin	ALB
Globulin	GLO
Total Protein	TP
Cholesterol	CHOL
Creatinine	SCR
Serum Glucose	SGL
Total Bilirubin	STB
Triglycerides	TG
Uric Acid	UA
Sodium	NA
Potassium	KS
Chloride	CL
Blood Urea Nitrogen	BUN
Total Calcium	TCA
Aspartate Aminotransferase	AST
Alanine Aminotransferase	ALT
Lactate Dehydrogenase	LDH
Gamma Glutamyl Transferase	GGT
Thyroid Stimulating Hormone	TSH
Free Thyroxine	fT4
Free Triiodothyronine	fT3
Total Thyroxine	TT4
Total Triiodothyronine	TT3
Thyroid Peroxidase Antibody	TPOAb
Thyroglobulin Antibodies	TgAb
Thyroglobulin	TG
Folate Intake	Folate
Total folate supplement intake (DFE)
Vitamin B12 intake
Urinary iodine concentration	UIC
